# Supplementary material for: Dexmedetomidine in prevention and treatment of postoperative and intensive care unit delirium: a systematic review and meta-analysis
Source: Ann Intensive Care. 2018 Sep 20;8:92. doi: 10.1186/s13613-018-0437-z (PMC6148680; doi:10.1186/s13613-018-0437-z)
Supplement: Supplementary file 1 — Additional file 1. Detailed search strategy of electronic database search of PubMed and the Cochrane Central Register of Controlled Trials (CENTRAL). [file 13613_2018_437_MOESM1_ESM.docx]

**Additional files 1: Appendix**

**Dexmedetomidine in Prevention and Treatment**

**of Postoperative and Intensive Care Unit Delirium**

**A Systematic Review and Meta-Analysis**

Julian Flükiger, MD1*, Alexa Hollinger, MD1,2,3*, Benjamin Speich, PhD4,5, Vera Meier1, Janna Tontsch1, Tatjana Zehnder1, Martin Siegemund, MD1

1Department for Anesthesia, Surgical Intensive Care, Prehospital Emergency Medicine and Pain Therapy, University Hospital Basel, Basel, Switzerland

2Department of Anaesthesiology, Burn and Critical Care Medicine, AP-HP, Saint Louis and Lariboisière University Hospitals, 2 rue Ambroise Paré, 75010 Paris, France

3Inserm 942 Paris, Biomarqueurs et maladies cardiaques, Hôpital Lariboisière - Bâtiment Viggo Petersen, 41, boulevard de la Chapelle, 75475 Paris Cedex 10, France

4Basel, Institute for Clinical **Epidemiology** and Biostatistics, Department of Clinical Research, University of **Basel** and University Hospital **Basel**, Basel, Switzerland

5Centre for Statistics in Medicine, Nuffield Department of Orthopaedics, Rheumatology and Musculoskeletal Sciences, University of Oxford, United Kingdom

*Both authors contributed equally to study design and writing of the manuscript.

**TABLE S1** Basis of clinical outcome results for placebo-controlled RCTs.

| **Dexmedetomidine vs. placebo** | |
| --- | --- |
|  |  |
| **ICU Length of Stay** | |
| Study | Values |
| Deiner 2017 | Median + IQR |
| Li X 2017 | Median + 95% CI |
| Su 2016 | Median + 95% CI |
| Devlin 2014 | Median + IQR |
|  |  |
| **Time to extubation or duration of MV** | |
| Study | Values |
| Li X 2017 | Median + 95% CI |
| Su 2016 | Median + 95% CI |
| Priye 2015 | Mean + SD |
| Devlin 2014 | Median + IQR |
| **Abbreviations:** CI, confidence interval, ICU, intensive care unit; IQR, interquartile range; MV, mechanical ventilation; SD, standard deviation | |

**TABLE S2** Basis of clinical outcome results for standard sedative-controlled RCTs.

| **Dexmedetomidine vs. standard sedatives** | |
| --- | --- |
|  |  |
| **ICU length of stay** | |
| Study | Values |
| Kawazoe 2017 | Median + IQR |
| Li Y 2017 | Mean + SD |
| Djaiani 2016 | Median + range |
| Huang 2012 | Mean + SD |
| Jakob 2012 | Median + IQR |
| Maldonado 2009 | Mean + SD |
| Ruokonen 2009 | Median + range |
| Pandharipande 2007 | Median + IQR |
| Corbett 2005 | Median + IQR |
|  |  |
| **Time to extubation or duration of MV** | |
| Study | Values |
| Li Y 2017 | Mean + SD |
| Djaiani 2016 | Median + range |
| Liu X 2016 | Median + IQR |
| Jakob 2012 | Median + IQR |
| Maldonado 2009 | Mean + SD |
| Ruokonen 2009 | Median + range |
| Corbett 2005 | Mean + SD |
| **Abbreviations:** ICU, intensive care unit; IQR, interquartile range; MV, mechanical ventilation; SD, standard deviation | |

**TABLE S3** Basis of clinical outcome results for opioid-controlled RCTs.

| **Dexmedetomidine vs. opioids** | |
| --- | --- |
|  |  |
| **ICU length of stay** | |
| Study | Values |
| Park 2014 | Mean + SD |
| Shehabi 2009 | Median + IQR |
|  |  |
| **Time to extubation or duration of MV** | |
| Study | Values |
| Park 2014 | Mean + SD |
| Shehabi 2009 | Median + IQR |
| **Abbreviations:** ICU, intensive care unit; IQR, interquartile range; MV, mechanical ventilation; SD, standard deviation | |

**TABLE S5** Adverse events in incidence comparison.

| **Adverse events** | **Dexmedetodimine vs. placebo** | | | | **Dexmedetodimine vs. standard sedatives** | | | | **Dexmedetodimine vs. opioids** | | | |
| --- | --- | --- | --- | --- | --- | --- | --- | --- | --- | --- | --- | --- |
|  | **Data sets (n)** | **Patients (n)** | **Random effects risk ratio** | ***I*2** | **Data sets (n)** | **Patients (n)** | **Random effects risk ratio** | ***I*2** | **Data sets (n)** | **Patients (n)** | **Random effects risk ratio** | ***I*2** |
| Mortality | 5 | 1508 | 0.92 (0.51-1.64) | 0% | 10 | 1907 | 0.97 (0.77-1.29) | 11% | 1 | 299 | 0.48 (0.09-2.60) | - |
| Bradycardia | 6 | 1587 | 1.35 (1.11-1.64) | 0% | 9 | 1829 | 2.05 (1.31-3.22) | 36% | 2 | 441 | 2.03 (1.07-3.83) | 22% |
| Tachycardia | 2 | 733 | 0.34 (0.30-0.76) | 0% | 4 | 1124 | 1.06 (0.70-1.62) | 75% | - | - | - | - |
| Hypotension | 6 | 1587 | 1.19 (1.03-1.38) | 0% | 8 | 1614 | 1.26 (1.04-1.54) | 9% | - | - | - | - |
| Hypertension | 2 | 1090 | 0.62 (0.49-0.80) | 0% | 2 | 998 | 1.18 (0.88-1.57) | 23% | - | - | - | - |
| Circulatory insufficiency | 1 | 700 | 0.80 (0.32-2.00) | - | - | - | - | - | - | - | - | - |

*Risk ratio for the following outcomes: mortality, bradycardia, tachycardia, hypotension, hypertension, circulatory insufficiency. Mean difference for the following outcomes: ICU length of stay (days), time to extubation or duration of mechanical ventilation (hours).

aMaldonado et al. 2009 had three treatment arms. Using the propofol- or the midazolam-arm in the control group did not significantly change the result for ICU length of stay (-1.23; 95% CI -2.17 to -0.29 and -1.24; 95% CI -2.24 to -0.23, respectively) and time to extubation or duration of mechanical ventilation (-5.53; 95% CI -10.45 to -0.62 and -6.75; 95% CI -12.16 to -1.33, respectively).

Abbreviations: CI = confidence interval; ICU=Intensive care unit.

**TABLE S6** Clinical outcomes of incidence comparison.

| **Clinical outcome** | **Dexmedetodimine vs. placebo** | | | | **Dexmedetodimine vs. standard sedatives** | | | | **Dexmedetodimine vs. opioids** | | | |
| --- | --- | --- | --- | --- | --- | --- | --- | --- | --- | --- | --- | --- |
|  | **Data sets (n)** | **Patients (n)** | **Random effects mean difference (95% CI)** | ***I*2** | **Data sets (n)** | **Patients (n)** | **Random effects mean difference (95% CI)** | ***I*2** | **Data sets (n)** | **Patients (n)** | **Random effects mean difference (95% CI)** | ***I*2** |
| ICU length of stay (days) | 5 | 1508 | -0.03 (-0.08 to 0.01) | 0% | 11 | 1983 | -1.29 (-2.15 to -0.42)a | 82% | 2 | 441 | 0.03 (-0.26 to 0.33) | 0% |
| Time to extubation or duration of mechanical ventilation (hours) | 5 | 864 | -0.47 (-1.31 to 0.38) | 43% | 9 | 1618 | -3.95 (-7.61 to -0.28)a | 81% | 2 | 441 | -0.01 (-4.92 to 4.90) | 49% |

aMaldonado et al. 2009 had three treatment arms. Using the propofol- or the midazolam-arm in the control group did not significantly change the result for ICU length of stay (-1.29; 95% CI -2.15 to -0.42 and -1.29; 95% CI -2.21 to -0.37, respectively) and time to extubation or duration of mechanical ventilation (-3.95; 95% CI -7.61 to -0.28 and -4.51; 95% CI -8.32 to -0.70, respectively).

**TABLE S7** Clinical outcomes of treatment comparison.

| **Study** | **Clinical outcome** | **Intervention** | **Control** | ***P*-value** |
| --- | --- | --- | --- | --- |
| **Reade 2016** | Resolution of delirium (hr), median (IQR) | 23.3 (13.0-54.0) | 40 (25.3-76.0) | 0.01 |
| **Yapici 2010** | CAM-ICU ≥ 3 36 hr postoperative, n | 38 of 38 patients | 34 of 34 patients | >0.05 |
| CAM-ICU ≥ 3 60 hr postoperative, n | 1 of 38 patients | 7 of 34 patients | <0.05 |
| **Reade 2009** | Proportion of time with ICDSC<4, %: median (IQR) | 95.5 (51-100) | 31.5 (17-97) | 0.122 |
| Proportion of time with ICDSC<1, %: median (IQR) | 61 (0-100) | 0 (0-0) | 0.134 |
| **Abbreviations:** hr, hours; ICDSC, Intensive Care Delirium Screening Checklist; IQR, interquartile range. | | | | |

**FIGURE S1** Funnel plot for standard sedative-controlled RCTs.


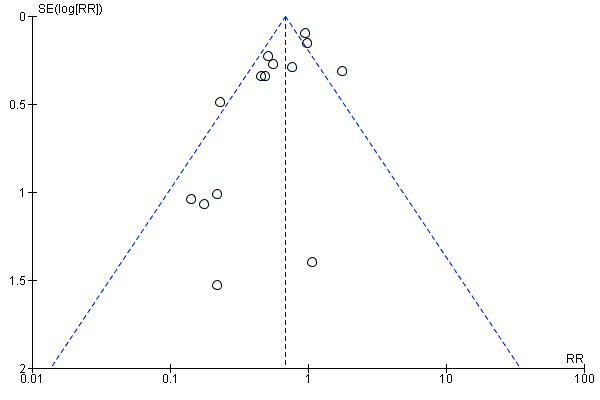


**FIGURE S2** Funnel plot for placebo-controlled RCTs


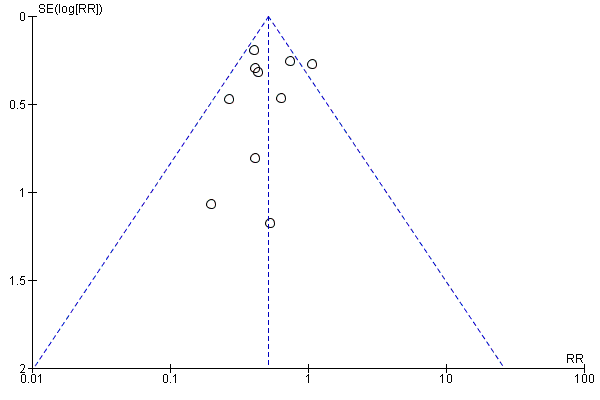


**SEARCH STRATEGY**

Detailed search strategy:

CENTRAL:

#1: MeSH descriptor: [Dexmedetomidine] explode all trees

#2: MeSH descriptor: [Delirium] explode all trees

#3: MeSH descriptor: [Respiration] explode all trees

#4: #2 or #3

#5: #1 and #4

PubMed:

((((delirium) AND dexmedetomidine)) OR ((dexmedetomidine[MeSH Terms]) AND ((Respiration, Artificial[MeSH Terms]) OR delirium[MeSH Terms]))) AND ((((randomized controlled trial[pt] OR controlled clinical trial[pt] OR randomized[tiab] OR placebo[tiab] OR clinical trials as topic[mesh:noexp] OR randomly[tiab] OR trial[ti] NOT (animals[mh] NOT humans [mh])))))
